# Supplementary material
Source: HighWire-hosted journal article supplement (https://bmjopen.bmj.com/content/9/5/e023014)
Supplement: inline-supplementary-material-2 [file inline-supplementary-material-2.pdf]

## Additional file 2:

**Table S2. Data Extraction Template**

| <b>Item</b>                               | <b>Entry</b> |
|-------------------------------------------|--------------|
| Guideline Id                              |              |
| Guideline Organization/society= Developer |              |
| Name of guideline or consensus statement  |              |
| Year of publication                       |              |
| Funding source                            |              |
| Country                                   |              |
| Target population                         |              |
| Definition of chronic heart failure       |              |
| Target Users                              |              |
| Guideline Writers                         |              |
| Guideline Review                          |              |
| Guideline Update                          |              |
| Methods Support                           |              |
| Evidence Base                             |              |
| Level of Evidence                         |              |
| Grade recommendations                     |              |
